# Supplementary material for: Stochastic Optimization Models for Transferring Delay Along Flight Trajectories to Reduce Fuel Usage
Source: Atypon-hosted journal article supplement (doi:10.1287/trsc.2016.0689), 2017-02-24
Supplement: trsc.2016.0689-sm.pdf [file trsc.2016.0689-sm.pdf]

## Appendix A

Proposition 1: *In the single runway case the expression of expected delay shown in equations (13) and (14) serves as a lower bound of the true delay at optimality.*

**Proof:** Assuming we are dealing with a single period and runway, we shall define our parameters as follows:

$Q \equiv$  The set of all possible outcomes

$S \equiv$  The set of all slots

The exact expression for the expected number of arrivals in slot  $s$  can be written as

$$\sum_{q \in Q} p_q W_q^s = \bar{W}^s \quad (\text{A1})$$

For a given outcome we can express the delay at slot  $s$  as

$$W_q^s = \max \left( (n_q^s + W_q^{s-1} + y_s - 1), 0 \right) \quad (\text{A2})$$

At optimality we have

$$W_q^{s*} = \max \left( (n_q^s + W_q^{s-1*} + y_s^* - 1), 0 \right) \quad (\text{A3})$$

Partition the set  $Q$  into two disjoint subsets as follows:

$V \equiv$  The set of all outcomes where  $n_q^s + W_q^{s-1*} + y_s^* - 1$  is positive

$U \equiv$  The set of all outcomes where  $W_q^{s*}$  is zero

Substituting (A3) into (A1) we have

$$\begin{aligned} \bar{W}^{s*} &= \sum_{q \in Q} p_q W_q^{s*} = \sum_{q \in Q} p_q \left( \max \left( (n_q^s + W_q^{s-1*} + y_s^* - 1), 0 \right) \right) \\ &= \sum_{q \in V} p_q (n_q^s + W_q^{s-1*} + y_s^* - 1) + \sum_{q \in U} p_q (0) \\ &= \sum_{q \in V} p_q (n_q^s + W_q^{s-1*} + y_s^* - 1) \end{aligned}$$

Since  $n_q^s + W_q^{s-1*} + y_s^* - 1$  is non-positive for all  $q \in U$ ,

$$\begin{aligned}
\bar{W}^{s*} &\geq \sum_{q \in Q} p_q (n_q^s + W_q^{s-1*} + y_s^* - 1) \\
&= \sum_{q \in Q} p_q n_q^s + \sum_{q \in Q} p_q W_q^{s-1*} + y_s^* \sum_{q \in Q} p_q - \sum_{q \in Q} p_q \\
&= \bar{n}^s + \bar{W}^{s-1*} + y_s^* - 1
\end{aligned}$$

where  $\bar{n}^s$  is the expected number of short haul arrivals during slot  $s$ . We also require that the expected number of arrivals be non-negative and

$$\bar{W}^{s*} \geq 0$$

So we have

$$\bar{W}^{s*} \geq \max\left(\left(\bar{n}^s + \bar{W}^{s-1*} + y_s^* - 1\right), 0\right)$$

Thus, the expressions in equations (13) and (14) serve as a lower bound on the true expected delay.  $\square$

*Corollary 1: In the single runway case the expression of expected delay shown in equations (13) and (14) serves as an exact representation of the true delay when all at least 1 flight arrives in a time interval (slot).*

**Proof:** When at least 1 flight arrives in every time interval (slot),  $n_q^s + W_q^{s-1} + y_s - 1 \geq 0$ , so (A2) can be rewritten as:

$$W_q^s = n_q^s + W_q^{s-1} + y_s - 1 \quad (\text{A4})$$

Linearity of (A4) allows the following expectations to be taken:

$$\bar{W}^s = \bar{n}^s + \bar{W}^{s-1} + y_s - 1$$

Thus  $\bar{w}^s$  is an exact transformation of the true expected delay.  $\square$
